# Supplementary material
Source: Springer Nature journal article supplement (https://www.springermedizin.de/resource/supplementary/12885_2013_4295_MOESM5_ESM.pdf/9467138)

**GRASP Region 2**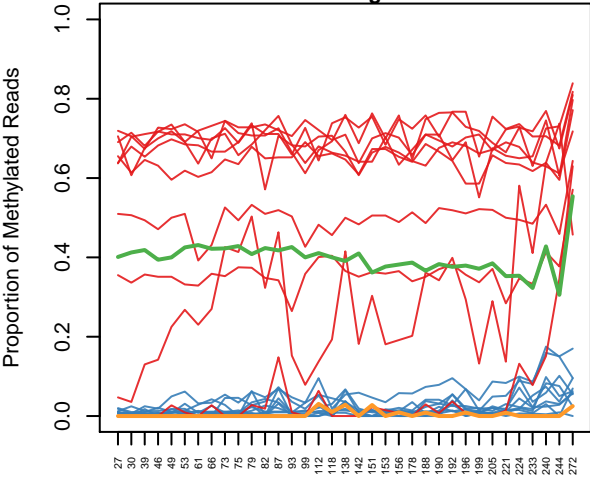**GRASP Region 3**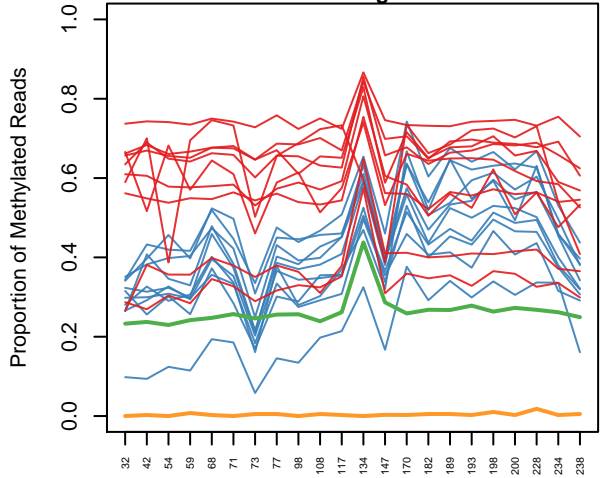**DLX5**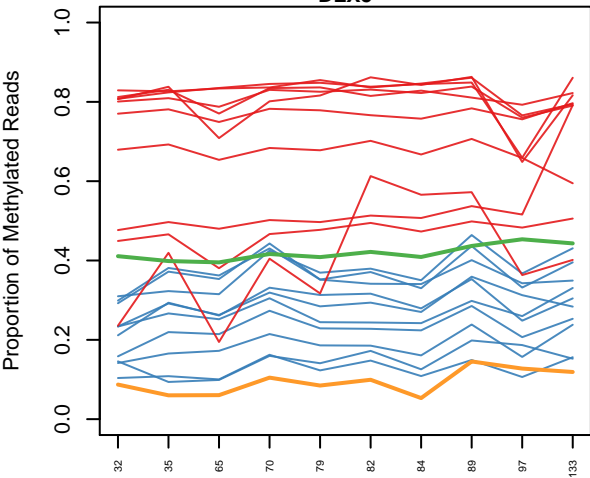**PDX1**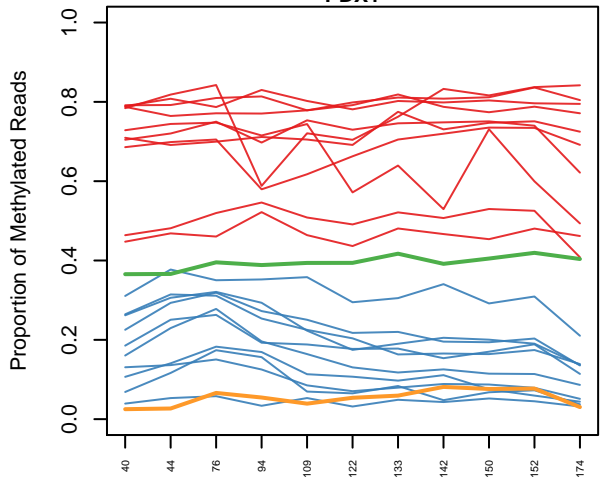**SDC2**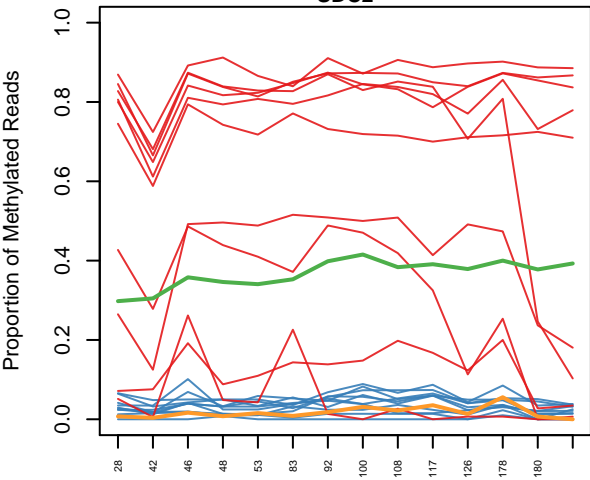**FOXD2**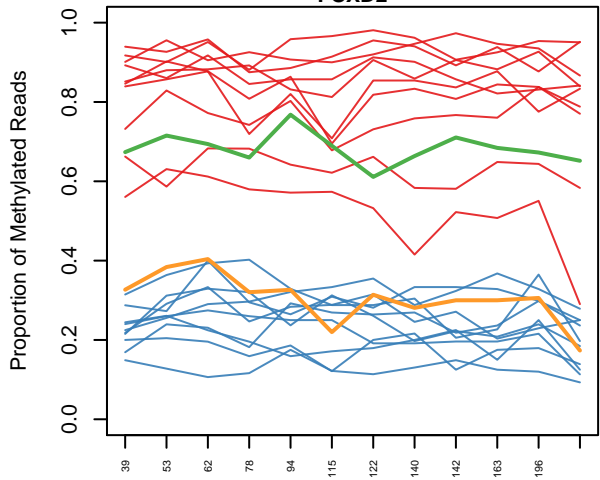

Supplement: MOESM5 [file 9467138]
